# Supplementary material
Source: PubMed Central journal article supplement (PMC3349763)
Supplement: NIHMS352090-supplement-Supp_Fig_S1.pdf [file NIHMS352090-supplement-Supp_Fig_S1.pdf]

Figure S1

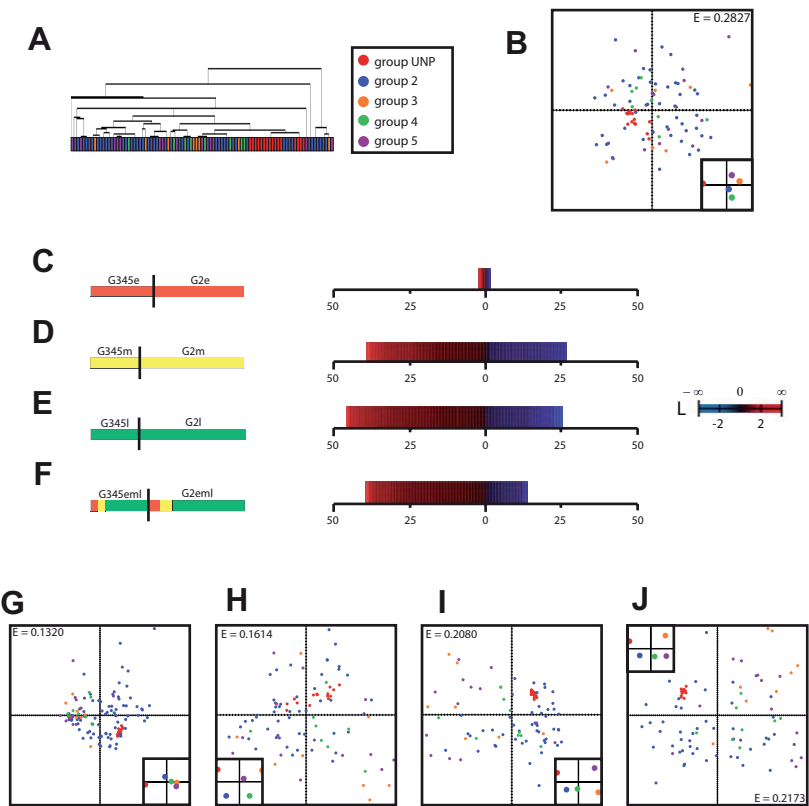

**Figure S1. Categorical time-specific profiling of genes differentially expressed when comparing severe forms of liver disease with the corresponding time categories of asymptomatic patient biopsies. (A).** Hierarchical clustering of the overall dataset but excluding samples after 24 months in group 2 computed over the entire set of genes. **(B).** SVD-MDS representation of the overall dataset but excluding samples after 24 months computed over the entire set of genes. Inlet shows the centers of gravity for the different groups. Coloring: see legend in (A). **(C).** Heatmap of the statistically significantly differentially expressed genes when comparing the "early" category of groups G3-G5 to the asymptomatic patients (G2). **(D).** Idem as (C) for the "intermediate" category. **(E).** Idem as (C) for the "late" category. **(F).** Idem as (C) for the combined "early", "intermediate", and "late" categories. **(G).** Idem as (F) for the G345e vs. G2e statistically differentially expressed genes (DEG). **(H).** Idem as (F) for the G345m vs. G2e DEG (without sample G5-M012-P038). **(I).** Idem as (F) for the G345l vs. G2e DEG. **(J).** Idem as (F) for the the G345eml vs. G2eml DEG (without sample G5-M012-P038).
