# Supplementary material
Source: PubMed Central journal article supplement (PMC3349763)
Supplement: NIHMS352090-supplement-Supp_Fig_S2.pdf [file NIHMS352090-supplement-Supp_Fig_S2.pdf]

Figure S2

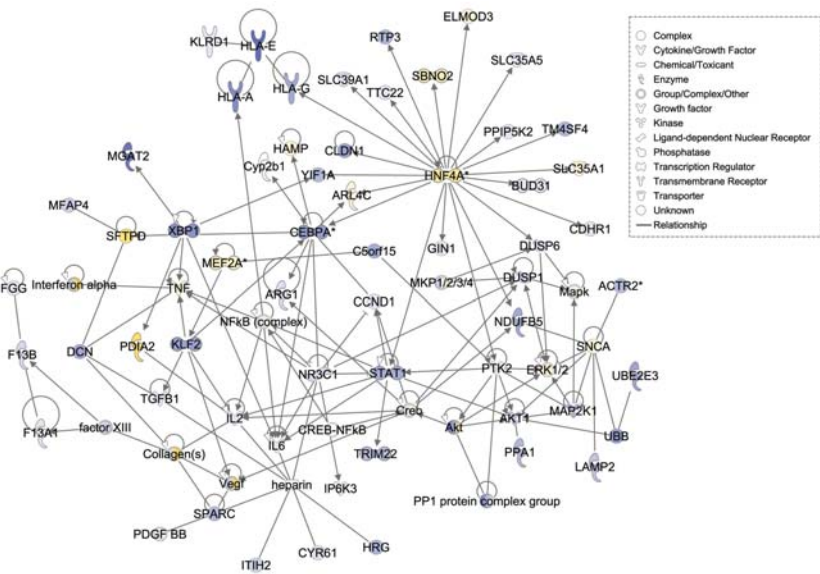

**Figure S2. Magnification of Figure 4C.** The cellular network differentially expressed between joint G2345 and joint G345 responsible for the G2345 to G345 transition (orange edge), merged with the G345e time-specific analysis gene sets, and built based on direct interactions between molecules. Data overlaid is the averaged G345e/G2 log<sub>2</sub> ratio expression data. Upregulated genes are shaded in yellow, and downregulated genes are shaded in blue.
